# Supplementary material
Source: PubMed Central journal article supplement (PMC4690472)
Supplement: NIHMS723563-supplement-2.pdf [file NIHMS723563-supplement-2.pdf]

## Macros used for quantifying S1P reporter in sections

---

```
macro "Reporter Regions"
{
/* Instructions
 * Draw ROI's and save as .zip file
 * set thresholds for each channel in the variables at the top of the
macro
 * open the .tif image to be analyzed
 * follow on screen instructions
   to select the folders to pull the ROI.zip files and where to save
the files
Macro functions
-Changes the background pixels in RFP and GFP channels to a value of
zero
-Divides GFP image by RFP image and creates a resulting image where
each pixel's values are the ratio of GFP to RFP for that pixel.
-Generates a membrane mask based on the CD169 and F480 stains.
-Opens the pre-saved ROI files for white pulp, red pulp, and marginal
zones
-Gives the average GFP:RFP ratio in each ROI
*/
var thresholdGFP = 0;
var thresholdRFP = 25;
var thresholdCD169 = 20;
var thresholdF480 = 32;
//also try RFP at 45 for a stricter gate
//10.02 is the maximum ratio if the RFP threshold is 25.

        //get image attributes
        name = getInfo("image.filename");
        original = getImageID();
        originalTitle = getTitle();

        //Set the directory where files will be pulled from
and saved to
        OpenDir=getDirectory("Choose the folder where data
will be pulled from");
        DataDir=getDirectory("Choose the folder where data
will be saved");
        //convert to 32 bit
        run("32-bit");

        // split channels and threshold the GFP and RFP
images.
        //If GFP=0, the ratio image will be 0, and will
become NaN during background-->NaN
        //If RFP=0, the ratio will be x/0, which should
return NaN, bc I set Misc options
```

```

run("Duplicate...", "title=GFPimage duplicate
channels=1");
GFPImage = getImageID();
GFPImageTitle = getTitle();
changeValues(0, thresholdGFP, 0)
selectImage(original);
run("Duplicate...", "title=RFPimage duplicate
channels=2");
RFPImage = getImageID();
RFPImageTitle = getTitle();
changeValues(0, thresholdRFP, 0)

// divide image1 by image2
run("Misc...", "divide=NaN");
imageCalculator("Divide create 32-bit", GFPImage,
RFPImage);
rename("RatioImage");
RatioImage = getImageID();
RatioImageTitle = getTitle();

// generation of membrane mask
//Mask the CD169
selectImage(original);
run("Duplicate...", "title=CD169 duplicate
channels=3");
setThreshold(thresholdCD169, 255);
run("Convert to Mask", " black");
CD169Image = getImageID();
CD169ImageTitle = getTitle();
//Mask the F480 (but delete MadCam1 staining)
selectImage(original);
run("Duplicate...", "title=F480 duplicate
channels=4");
F480Image = getImageID();
F480ImageTitle = getTitle();
//ROIs to delete needs to be a separate file
roiManager("Reset");
open(OpenDir + "RoiSetDUMP.zip");
WProiCount=roiManager("count");
//selectImage(F480Image);
for (i=0; i<WProiCount; i++) {
roiManager("Select",i);
run("Set...", "value=0");}
setThreshold(thresholdF480, 255);
run("Convert to Mask", " black");
//Create masked image using CD169 and the F480 image
with MadCam1 stain deleted
imageCalculator("OR create 32-bit", CD169Image,
F480Image);
rename("MemMaskImage")

```

```

//to make the mask values either 1 or 0.
run("Divide...", "value=255.000000000");
MemMaskImage = getImageID();
MemMaskTitle = getTitle();

// calculate RFP to GFP ratio on membrane.
imageCalculator("Multiply create 32-bit", RatioImage,
MemMaskImage);
setThreshold(0.0001, 255.0000);
run("NaN Background");
rename(originalTitle + "MemRatio");
MemRatioImage = getImageID();
MemRatioTitle = getTitle();
run("Fire");
saveAs("Tiff", DataDir+MemRatioTitle+".tif");
setMinAndMax(0.0000, 4.000);
selectImage(RFPImage); close();
selectImage(GFPImage); close();

//Ratio measurements
run("Set Measurements...", "area mean display redirect=None
decimal=3");
roiManager("Reset");
open(OpenDir + "RoiSetWP.zip");
ROICountWP=roiManager("Count");//=3
for (i=0; i<ROICountWP; i++) {
    roiManager("Select",i);
    roiManager("Rename", "WP");
}
open(OpenDir + "RoiSetRP.zip");
ROICountRP=roiManager("Count");
for (i=ROICountWP; i<ROICountRP; i++) {
    roiManager("Select",i);
    roiManager("Rename", "RP");
}
open(OpenDir + "RoiSetMZ.zip");
ROICountMZ=roiManager("Count")
for (i=ROICountRP; i<ROICountMZ; i++) {
    roiManager("Select",i);
    roiManager("Rename", "MZ");
}
roiManager("Deselect");
roiManager("Measure");
//Adding the settings to the results table:
i = nResults; // variable for counting,
initialising with 0
setResult("Image name", i, originalTitle);
setResult("thresholdGFP", i,
thresholdGFP); // add a "Label" column to the results table
and name the entry "point1"
setResult("thresholdRFP", i, thresholdRFP);

```

```

        setResult("thresholdCD169", i, thresholdCD169);
        setResult("thresholdF480", i, thresholdF480);
        selectWindow("Results");
        saveAs("Results", DataDir + originalTitle + ".xls");
    }

```

---

```

macro "GFP to RFP density"
{
/* Instructions
 * Draw ROI's and save as .zip file
 * set GFP and RFP thresholds by negative image as thresholdGFP and
thresholdRFP variables
 * open the .tif image to be analyzed
 * follow on screen instructions
   to select the folders to pull the ROI.zip files and where to save
the files
Macro functions
-Take each MZ ROI and each RP ROI and
-Calculate the density of GFP within that entire ROI (after setting a
threshold to eliminate background GFP pixels)
-Calculate the density of RFP within that entire ROI (after setting an
RFP threshold)
-Divide the GFP density by the RFP density to get a reporting density
ratio for that ROI.
*/
var thresholdGFP = 24;
var thresholdRFP = 33;

        //get image attributes
        name = getInfo("image.filename");
        original = getImageID();
        originalTitle = getTitle();
        //Set the directory where files will be pulled from
and saved to
        OpenDir=getDirectory("Choose the folder where data
will be pulled from");
        DataDir=getDirectory("Choose the folder where data
will be saved");
        //convert to 32 bit
        run("32-bit");
        // split channels and threshold the GFP and RFP
images.
        run("Duplicate...", "title=GFPimage duplicate
channels=1");
        GFPImage = getImageID();
        GFPImageTitle = getTitle();
        changeValues(0, thresholdGFP, 0)
        selectImage(original);

```

```

run("Duplicate...", "title=RFPimage duplicate
channels=2");
RFPImage = getImageID();
RFPImageTitle = getTitle();
changeValues(0, thresholdRFP, 0)
//Measure the area and intensities of the image
selectImage(GFPIImage);
run("Set Measurements...", "area mean integrated
display redirect=None decimal=2");
roiManager("Reset");
open(OpenDir + "RoiSetWP.zip");
ROICountWP=roiManager("Count");//=3
for (i=0; i<ROICountWP; i++) {
    roiManager("Select",i);
    roiManager("Rename", "WP");
}
open(OpenDir + "RoiSetRP.zip");
ROICountRP=roiManager("Count");
for (i=ROICountWP; i<ROICountRP; i++) {
    roiManager("Select",i);
    roiManager("Rename", "RP");
}

open(OpenDir + "RoiSetMZ.zip");
ROICountMZ=roiManager("Count")
for (i=ROICountRP; i<ROICountMZ; i++) {
    roiManager("Select",i);
    roiManager("Rename", "MZ");
}
roiManager("Deselect");
roiManager("Measure");

//RFP measurements
selectImage(RFPImage);
roiManager("Reset");
open(OpenDir + "RoiSetWP.zip");
ROICountWP=roiManager("Count");//=3
for (i=0; i<ROICountWP; i++) {
    roiManager("Select",i);
    roiManager("Rename", "WP");
}
open(OpenDir + "RoiSetRP.zip");
ROICountRP=roiManager("Count");
for (i=ROICountWP; i<ROICountRP; i++) {
    roiManager("Select",i);
    roiManager("Rename", "RP");
}
open(OpenDir + "RoiSetMZ.zip");
ROICountMZ=roiManager("Count")
for (i=ROICountRP; i<ROICountMZ; i++) {

```

```
roiManager("Select",i);
roiManager("Rename", "MZ");
}
roiManager("Deselect");
roiManager("Measure");

//Adding the settings to the results table:
i = nResults; // variable for counting,
initialising with 0
setResult("Image name", i, originalTitle);
setResult("thresholdGFP", i, thresholdGFP);
setResult("thresholdRFP", i, thresholdRFP);
// save the results table as an excel file
selectWindow("Results");
saveAs("Results", DataDir + originalTitle +"GFP RFP
dens" + ".xls");
selectWindow("Results"); close();
}
```
